# Supplementary material
Source: MDPI journal article supplement (https://www.mdpi.com/2073-4395/13/1/98)
Supplement: s1 [file s1 › agronomy-2053787-supplementary.pdf]

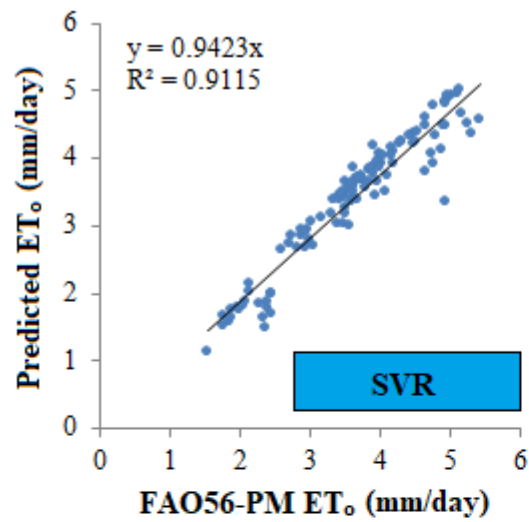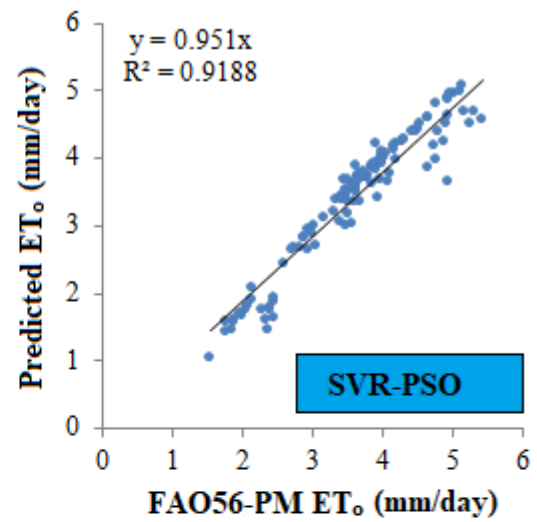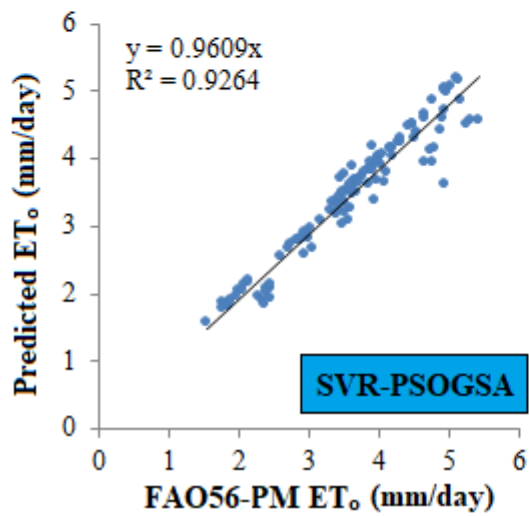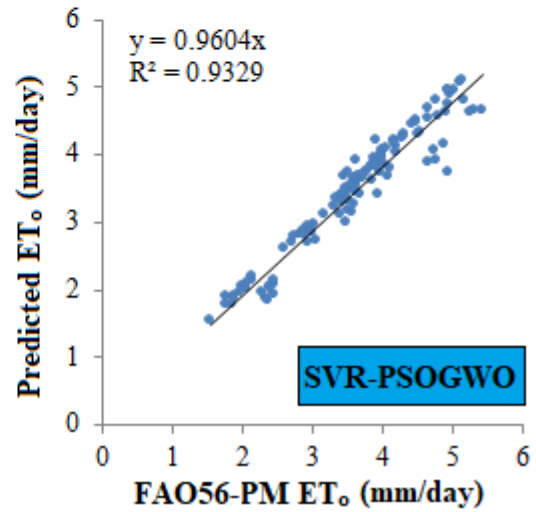

Figure S1. Scatterplots of the observed and predicted ET different SVR based models in the test period of Bogra Station

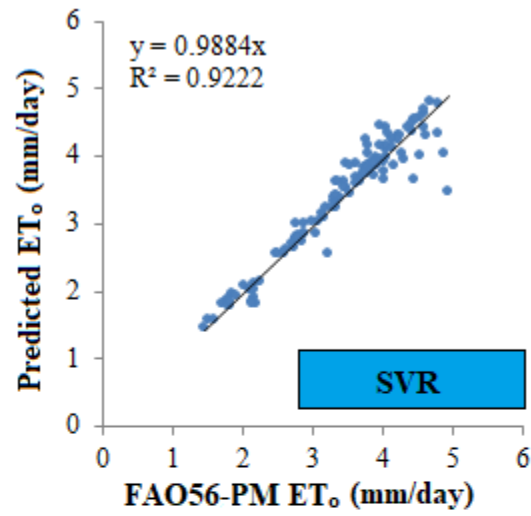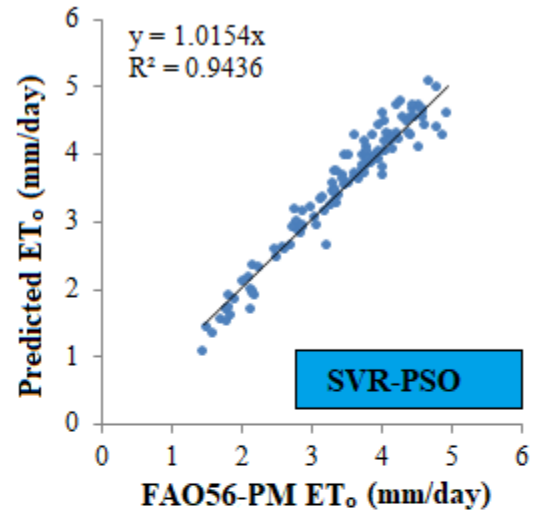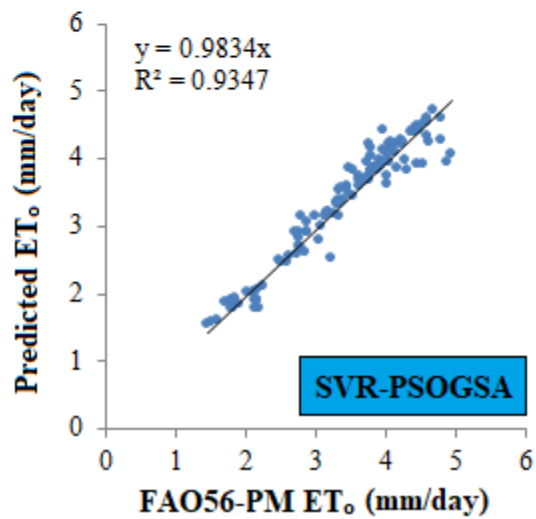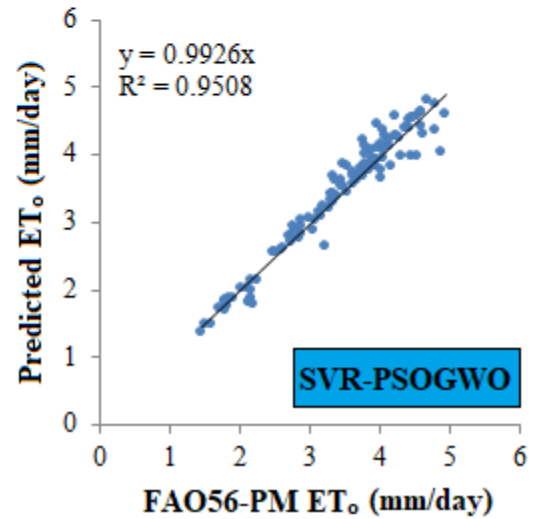

Figure S2. Scatterplots of the observed and predicted ET different SVR based models in the test period of Rajshahi Station

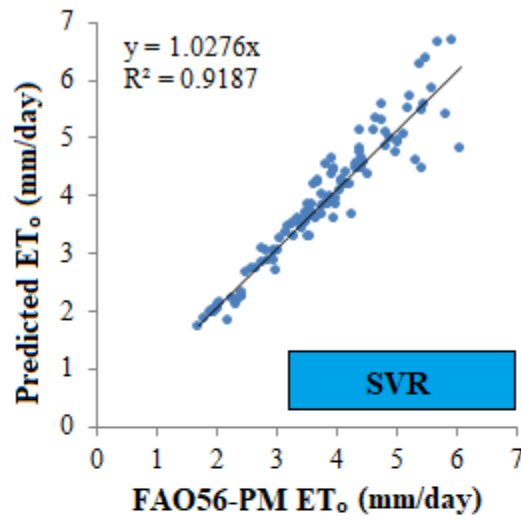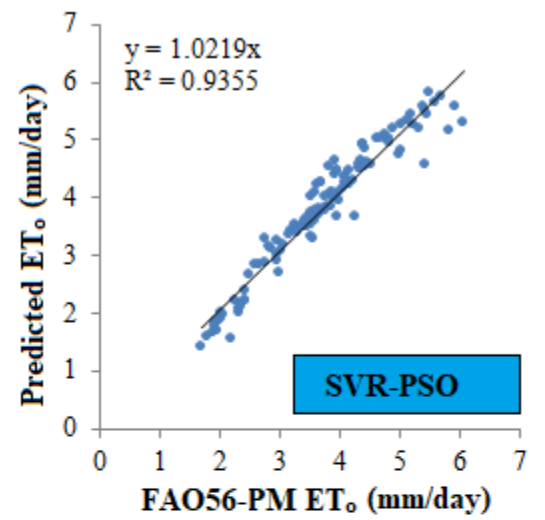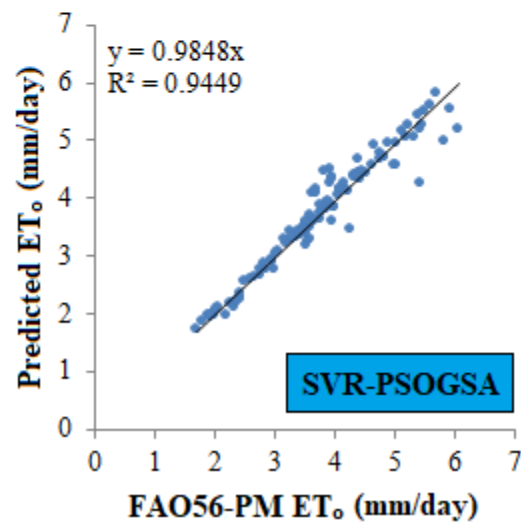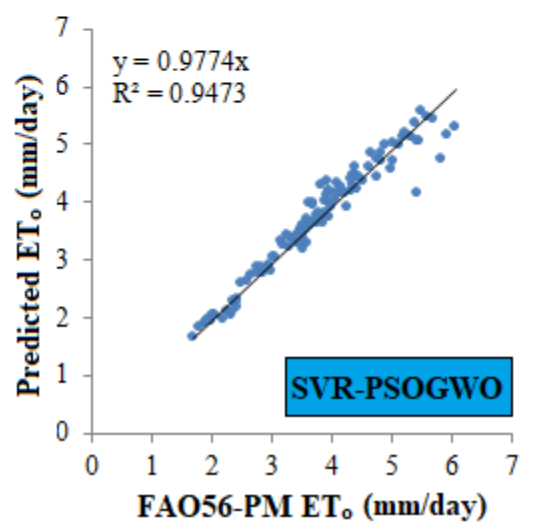

Figure S3. Scatterplots of the observed and predicted ET different SVR based models in the test period of Rangpur Station

$et_0$
